# Supplementary material for: Oral Health-Related Quality of Life in Adult Patients with Depression or Attention Deficit Hyperactivity Disorder (ADHD)
Source: MDPI journal article supplement (doi:10.3390/jcm12227192), 2023-11-20
Supplement: s1 [file s1]

**Please answer the following questions regarding your oral hygiene, oral complaints and dental behavior.**

|                                                                    | <b>Yes</b>               | <b>No</b>                |
|--------------------------------------------------------------------|--------------------------|--------------------------|
| 1. Do you suffer from bleeding gums?                               | <input type="checkbox"/> | <input type="checkbox"/> |
| 2. Do you perceive a bad taste/worsened taste?                     | <input type="checkbox"/> | <input type="checkbox"/> |
| 3. Did you already undergo a periodontal treatment?                | <input type="checkbox"/> | <input type="checkbox"/> |
| 4. Are you smoker?                                                 | <input type="checkbox"/> | <input type="checkbox"/> |
| 5. Do you visit your dentist regularly (e.g. once a year)?         | <input type="checkbox"/> | <input type="checkbox"/> |
| 6. Do you regularly undergo a professional tooth cleaning?         | <input type="checkbox"/> | <input type="checkbox"/> |
| 7. Is your dentist informed about your psychiatric disease?        | <input type="checkbox"/> | <input type="checkbox"/> |
| 8. Do you feel well-educated with regard to oral hygiene measures? | <input type="checkbox"/> | <input type="checkbox"/> |
| 9. Do you use one of the following devices for oral hygiene?       |                          |                          |
| <input type="checkbox"/> Interdental brushes or floss              |                          |                          |
| <input type="checkbox"/> Mouthrinse                                |                          |                          |

**Thank you for participation**
